# Supplementary material for: Enhancing energy balance in wireless sensor networks through optimized minimum spanning tree
Source: PubMed Central journal article supplement (PMC11623227; doi:10.7717/peerj-cs.2269), 2024-09-26
Supplement: peerj-cs-10-2269-s004.pdf [file peerj-cs-10-2269-s004.pdf]

Date:15/08/2024  
Riyadh, Saudi Arabia

### To whom it may concern

This letter is to formally notify that the employment contract of Mr. Mohammed A El-Meligy with the Industrial Engineering Department, College of Engineering, King Saud University, Riyadh, Saudi Arabia, concluded on the 15th of July, 2024.

Mr. El-Meligy has served with dedication and professionalism during his tenure with the department. His contributions to our academic and research endeavors have been highly valued, and we wish him success in all future endeavors.

**Please accept my sincere greetings and appreciation.**

Dr Ibrahim Abdullah Almuheidib

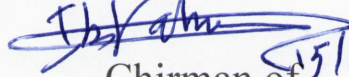  
15/8/2024

Chirman of

Industrial Engineering Department
